# Supplementary material for: Determinants of dental absenteeism among young children in California: A logistic regression analysis of CHIS 2017–2022
Source: Research Square preprint supplement (doi:10.21203/rs.3.rs-8389565/v1), 2025-12-30
Supplement: Supplementary file 1 [file 292130637adae8b4e0ddd4bf.docx]

**Supplement for**

**Determinants of dental absenteeism among young children in California: A logistic regression analysis of CHIS 2017–2022**

Sean Darling-Hammond 1*

Anne Katherine Wikle 2

Alisha Kaur Judge 3

Vinodh Bhoopathi 4

1 University of California, Berkeley, School of Public Health, Berkeley, CA, USA, 94702

2 University of California, Berkeley, School of Education, Berkeley, CA, USA, 94702

3 University of California, Berkeley, College of Chemistry, Berkeley, CA, USA, 94702

4 University of California, Los Angeles, School of Dentistry, Los Angeles, CA, USA, 90024

* The corresponding author can be reached at:

Email: [seandh@berkeley.edu](mailto:seandh@berkeley.edu)

Address: 2121 Berkeley Way, Berkeley, CA, 94704

This documents provides supplemental analysis for the above-titled manuscript.

# Comparing logit and firthlogit results

Our models predict an arguably rare event. In our main models (presented in the manuscript) we thus leverage robust standard errors. However, another approach to address rare events is to leverage firth logistic regression (easily operationalized via STATA’s firthlogit command). Here we provide a side-by-side comparison of our final, “Model 4” results using either logistic regression with robust standard errors or Firth logistic regression. As depicted in Table S.1 below, results are functionally identical.

| **Table S1.** Comparing results from logistic regression with robust standard errors and firth logistic regression | | |
| --- | --- | --- |
| **Variable** | **Logistic (Robust SE)** | **Firth Logistic (Normal SE)** |
| **Age (Ref: 5–6 years old)** |  |  |
| 7–8 years old | 1.46* (0.26) | 1.45* (0.26) |
| 9–11 years old | 0.99 (0.17) | 0.99 (0.16) |
| **Race (Ref: Asian)** |  |  |
| Black | 1.50 (0.59) | 1.53 (0.59) |
| Hispanic | 1.68* (0.43) | 1.66* (0.43) |
| White | 1.73* (0.43) | 1.70* (0.43) |
| Other race | 1.57 (0.42) | 1.55 (0.42) |
| **Income (Ref: 0–99% FPL)** |  |  |
| 100–199% FPL | 1.20 (0.26) | 1.19 (0.25) |
| 200–299% FPL | 0.98 (0.24) | 0.99 (0.25) |
| 300% FPL+ | 1.06 (0.23) | 1.06 (0.23) |
| **Education (Ref: <9th Grade)** |  |  |
| 9th–11th Grade | 0.85 (0.39) | 0.86 (0.39) |
| 12th Grade | 1.32 (0.46) | 1.29 (0.44) |
| Some College | 1.01 (0.39) | 0.99 (0.37) |
| Associates / Vocational | 1.15 (0.43) | 1.12 (0.41) |
| Bachelors / Some Grad | 0.99 (0.36) | 0.97 (0.35) |
| Masters | 0.90 (0.35) | 0.88 (0.34) |
| PhD / equivalent | 1.25 (0.53) | 1.23 (0.50) |
| **Household type (Ref: Married)** |  |  |
| Unmarried | 1.33* (0.19) | 1.33* (0.19) |
| **Region (Ref: Urban)** |  |  |
| Rural | 1.32 (0.21) | 1.32 (0.20) |
| **Language at home (Ref: English only)** |  |  |
| English & other | 1.11 (0.19) | 1.11 (0.19) |
| No English | 1.25 (0.31) | 1.26 (0.29) |
| **Citizenship (Ref: U.S. born)** |  |  |
| Naturalized / Non-citizen | 1.36 (0.40) | 1.39 (0.39) |
| **Insurance (Ref: Currently uninsured)** |  |  |
| Uninsured any prior point, last 12 months | 0.61 (0.55) | 0.68 (0.55) |
| Insured all of last 12 months | 1.46 (0.77) | 1.31 (0.65) |
| **Couldn’t get needed dental (Ref: No)** |  |  |
| Yes | 2.30*** (0.41) | 2.31*** (0.41) |
| **General health (Ref: Fair or Poor)** |  |  |
| Good | 0.58 (0.18) | 0.58 (0.18) |
| Very good | 0.48** (0.14) | 0.47** (0.14) |
| Excellent | 0.37*** (0.11) | 0.36*** (0.10) |
| n | 8,470 | 8,470 |

# Comparison of complete case and imputed data

Our manuscript leverages a complete case sample. However, we note that among children who provided information about our outcome of interest, some did not provide information about certain predictors. Specifically, among the 9,952 children for whom CHIS had information about whether or not they missed school due to dental issues, information about parental / caregiver education was not available for 1,478 participants, information about insurance coverage was not available for 3 participants, and information about both variables was lacking for 1 participant. Our complete case analysis thus dropped 1,482 participants—a sizeable data loss—and retained 8,470.

We thus leveraged STATA’s multiple imputation paradigm to impute values for these two variables using information about all other predictors (age, race, income, married or unmarried caregivers, urban or rural, language at home, citizenship, having been financial unable to access needed dental care, and general health). We replicate our final logistic regression model (“Model 4”) and show a side by side comparison of the model using the complete case sample and the imputed sample. Results are functionally identical for all variables with the sole exception of Race: Hispanic and Race: White, which were statistically significant (p < .05) predictors in the complete case sample analysis, but were only marginally significant (Hispanic: p = .089; White: p = 0.068) in the imputed sample analysis.

| **Table S2.** Comparing results from complete case and multiply imputed (20 run) samples. | | |
| --- | --- | --- |
| **Variable** | **Complete-case OR [95% CI]** | **Imputed OR [95% CI]** |
| **Age (Ref: 5–6 years old)** |  |  |
| 7–8 years old | 1.46* [1.03, 2.08] | 1.49* [1.07, 2.08] |
| 9–11 years old | 0.99 [0.72, 1.38] | 1.03 [0.76, 1.41] |
| **Race (Ref: Asian)** |  |  |
| Black | 1.50 [0.70, 3.22] | 1.18 [0.56, 2.48] |
| Hispanic | 1.68* [1.02, 2.76] | 1.47 [0.94, 2.28] |
| White | 1.73* [1.07, 2.81] | 1.51 [0.97, 2.36] |
| Other race | 1.57 [0.93, 2.66] | 1.20 [0.74, 1.94] |
| **Income (Ref: 0–99% FPL)** |  |  |
| 100–199% FPL | 1.20 [0.79, 1.83] | 1.19 [0.78, 1.82] |
| 200–299% FPL | 0.98 [0.60, 1.60] | 0.96 [0.59, 1.56] |
| 300% FPL+ | 1.06 [0.70, 1.62] | 0.94 [0.63, 1.40] |
| **Education (Ref: <9th Grade)** |  |  |
| 9th–11th Grade | 0.85 [0.35, 2.07] | 0.79 [0.32, 1.93] |
| 12th Grade | 1.32 [0.67, 2.61] | 1.19 [0.61, 2.35] |
| Some College | 1.01 [0.48, 2.13] | 0.91 [0.44, 1.91] |
| Associates / Vocational | 1.15 [0.55, 2.38] | 1.03 [0.50, 1.88] |
| Bachelors / Some Grad | 0.99 [0.48, 2.04] | 0.90 [0.44, 1.85] |
| Masters | 0.90 [0.42, 1.93] | 0.82 [0.40, 1.77] |
| PhD / equivalent | 1.25 [0.54, 2.85] | 1.09 [0.48, 2.49] |
| **Household type (Ref: Married)** |  |  |
| Unmarried | 1.33* [1.00, 1.76] | 1.32* [1.01, 1.72] |
| **Region (Ref: Urban)** |  |  |
| Rural | 1.32 [0.97, 1.80] | 1.31 [0.97, 1.76] |
| **Language at home (Ref: English only)** |  |  |
| English & other | 1.11 [0.79, 1.56] | 1.12 [0.81, 1.54] |
| No English | 1.25 [0.77, 2.04] | 1.12 [0.71, 1.76] |
| **Citizenship (Ref: U.S. born)** |  |  |
| Naturalized / Non-citizen | 1.36 [0.76, 2.41] | 1.21 [0.70, 2.10] |
| **Insurance (Ref: Currently uninsured)** |  |  |
| Uninsured any past 12 mo | 0.61 [0.11, 3.53] | 0.47 [0.09, 2.54] |
| Insured all past 12 mo | 1.46 [0.52, 4.09] | 1.27 [0.51, 3.18] |
| **Couldn’t get needed dental (Ref: No)** |  |  |
| Yes | 2.30*** [1.63, 3.26] | 2.21*** [1.60, 3.04] |
| **General health (Ref: Fair or Poor)** |  |  |
| Good | 0.58 [0.32, 1.07] | 0.52* [0.29, 0.92] |
| Very good | 0.48** [0.27, 0.84] | 0.49** [0.29, 0.85] |
| Excellent | 0.37*** [0.21, 0.65] | 0.37*** [0.21, 0.63] |
| **n** | 8,470 | 9,952 |
